# Supplementary material for: Multicomponent synthesis of novel hybrid PHQ-fatty acids
Source: Royal Society of Chemistry journal article supplement (doi:10.1039/c5ra09433j), 2015-01-01
Supplement: c5ra09433j1.pdf [file c5ra09433j1.pdf]

## Supplementary data

# Multicomponent synthesis of new hybrid PHQ-fatty acids

H. D. Fontecha-Tarazona<sup>a</sup>, R. C. Brinkerhoff<sup>a</sup>, P. M. de Oliveira<sup>a</sup>, S. B. Rosa<sup>a</sup>, D. C. Flores<sup>a</sup>, C. Da R. Montes D'Oca<sup>b</sup>, D. Russowsky<sup>b</sup> and M. G. Montes D'Oca.<sup>\*,a</sup>

<sup>a</sup>Laboratório Kolbe de Síntese Orgânica, Escola de Química e Alimentos, Universidade Federal do Rio Grande, Rio Grande, RS, Brazil

<sup>b</sup>Laboratório de Síntese Orgânica, Instituto de Química, Universidade Federal do Rio Grande do Sul, Porto Alegre, RS, Brazil

## Contents

|                                                                 |        |
|-----------------------------------------------------------------|--------|
| 1. Selected <sup>1</sup> H and <sup>13</sup> C NMR spectra..... | S2-S19 |
|-----------------------------------------------------------------|--------|

---

\*Corresponding author: Escola de Química e Alimentos, Universidade Federal do Rio Grande, Av. Itália, km 08, s/n. Carreiros. 96203-900. Rio Grande, RS, Brazil. Tel: +55 53 32336960; fax +55 53 3233 6961. E-mail address: [dqmdoca@furg.br](mailto:dqmdoca@furg.br) (MGM D'Oca)



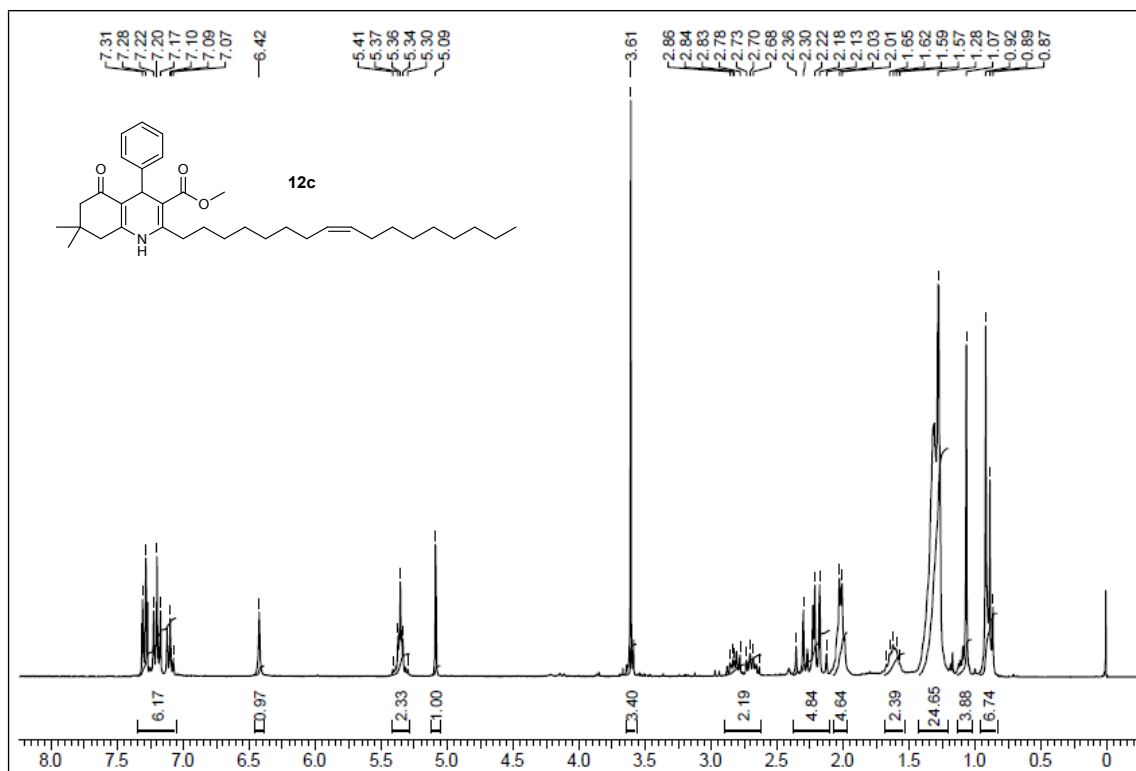

**Figure S3.** <sup>1</sup>H NMR spectrum (CDCl<sub>3</sub>, 300 MHz) of **12c**.

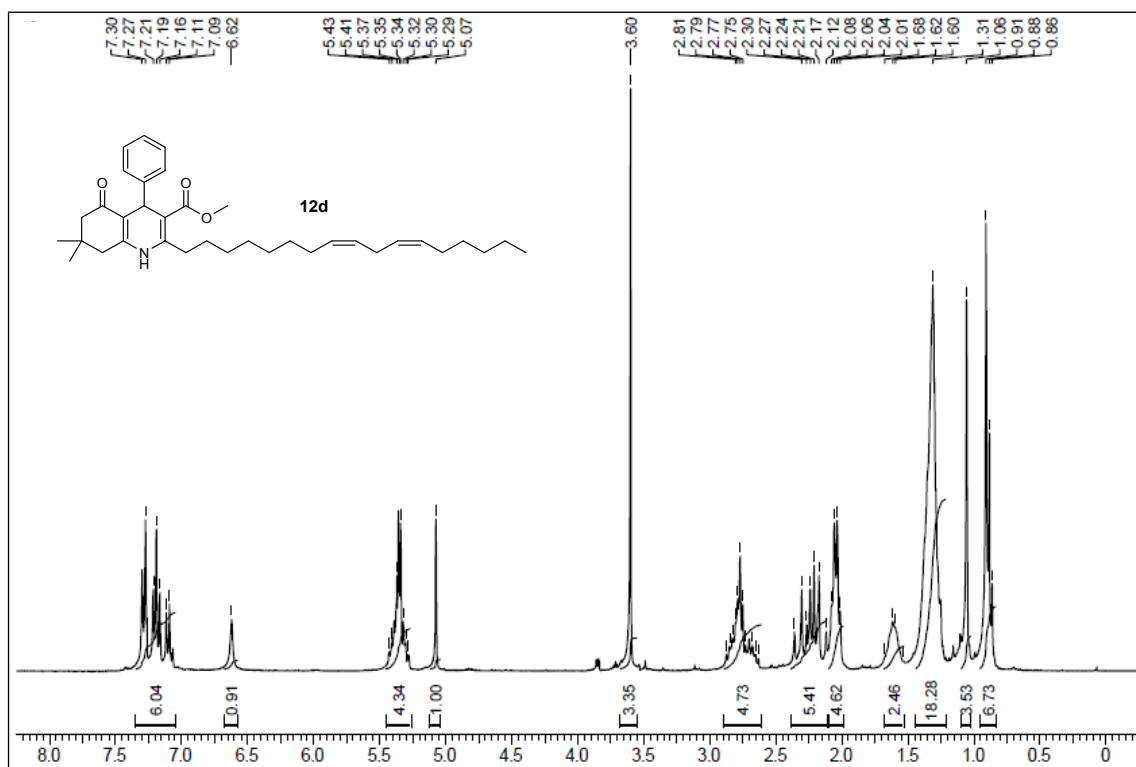

**Figure S4.** <sup>1</sup>H NMR spectrum (CDCl<sub>3</sub>, 300 MHz) of **12d**.

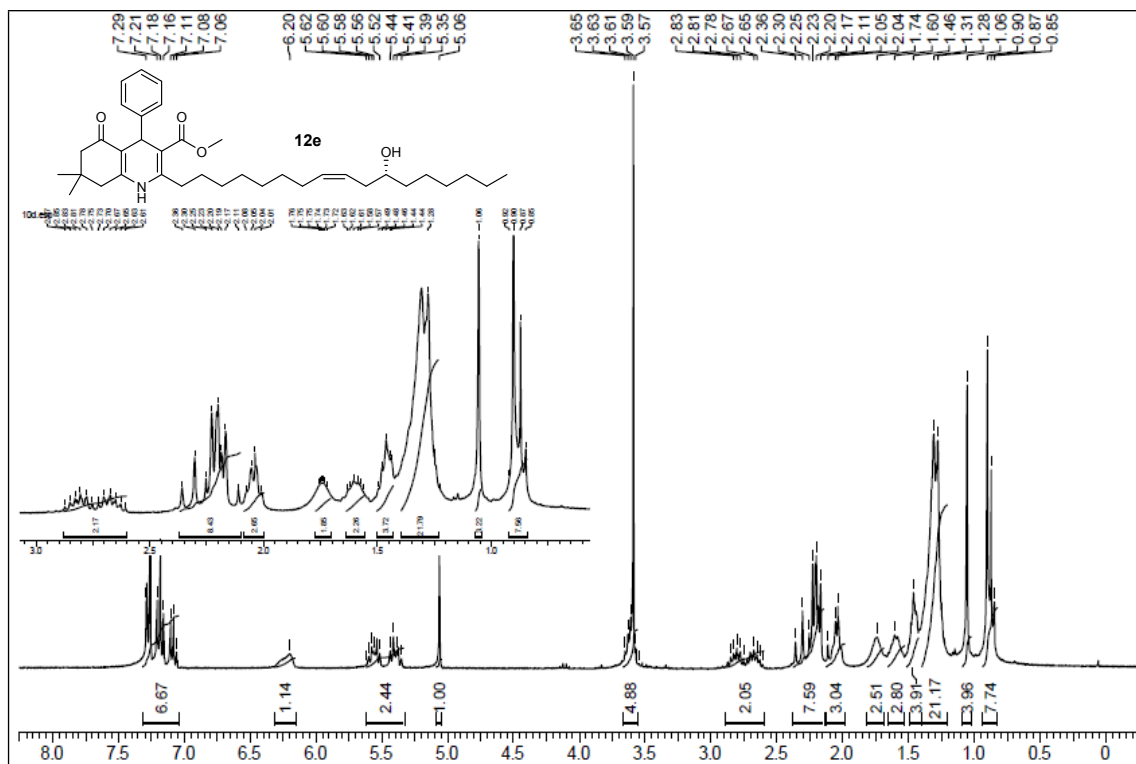

Figure S5.  $^1\text{H}$  NMR spectrum ( $\text{CDCl}_3$ , 300 MHz) of **12e**.

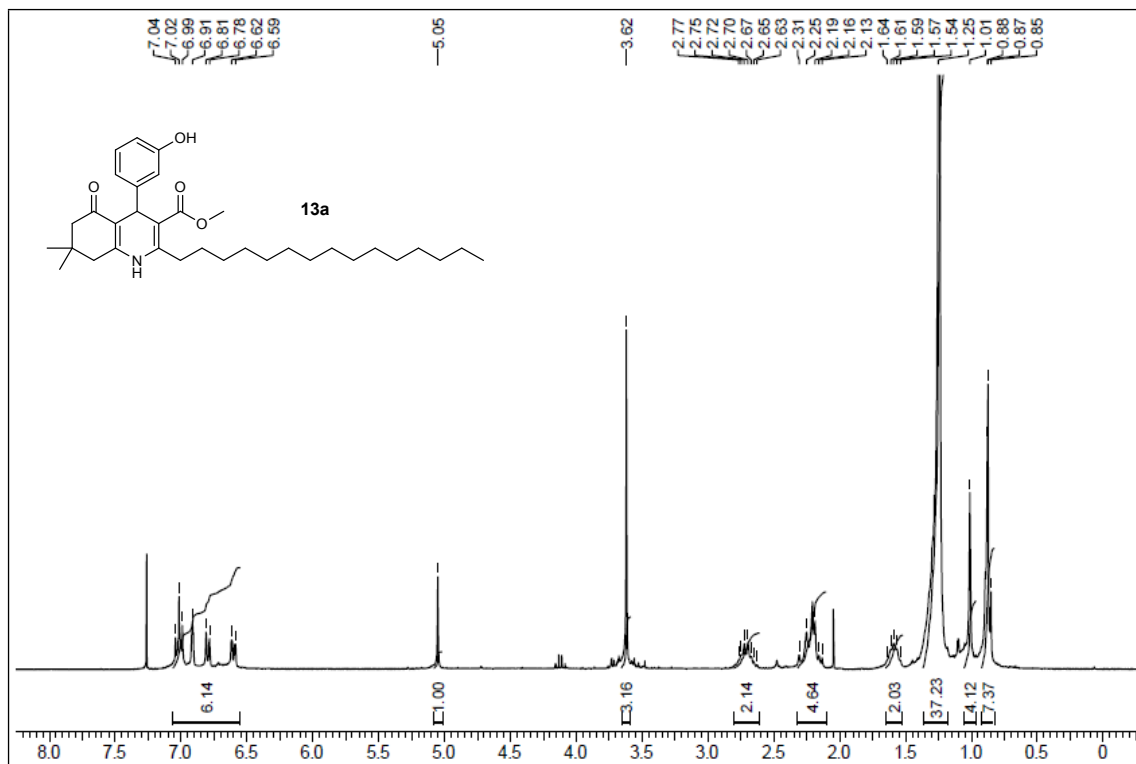

Figure S6.  $^1\text{H}$  NMR spectrum ( $\text{CDCl}_3$ , 300 MHz) of **13a**.

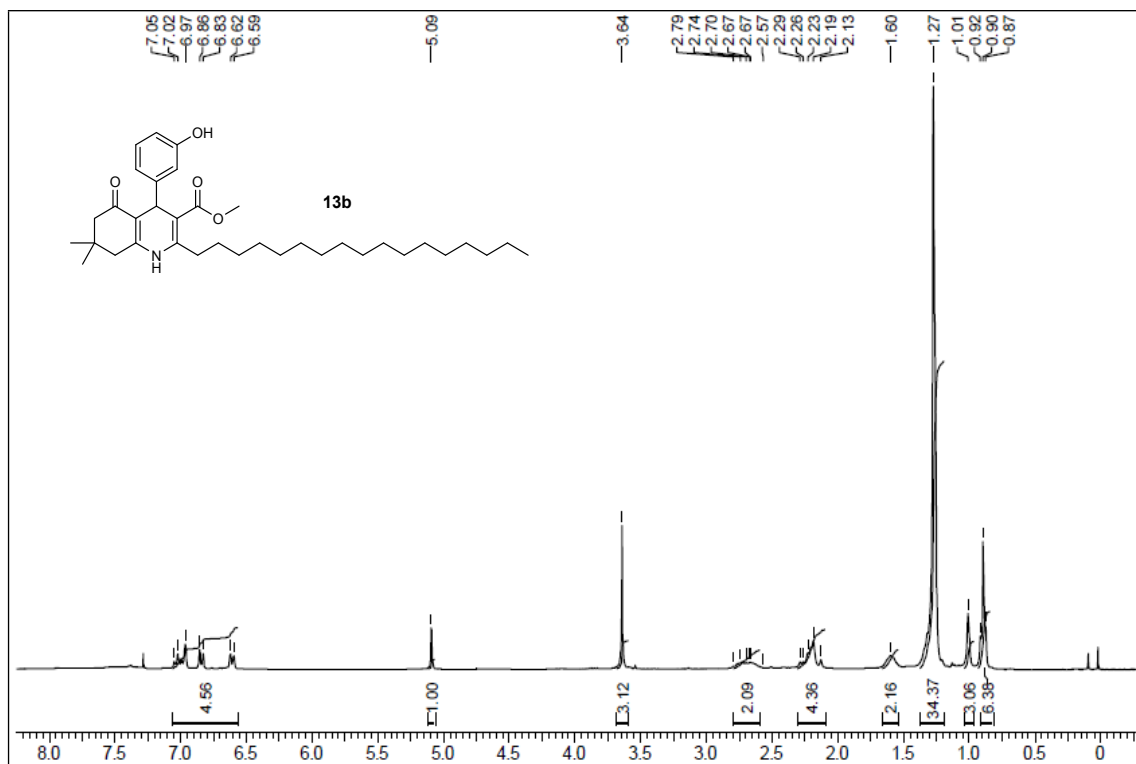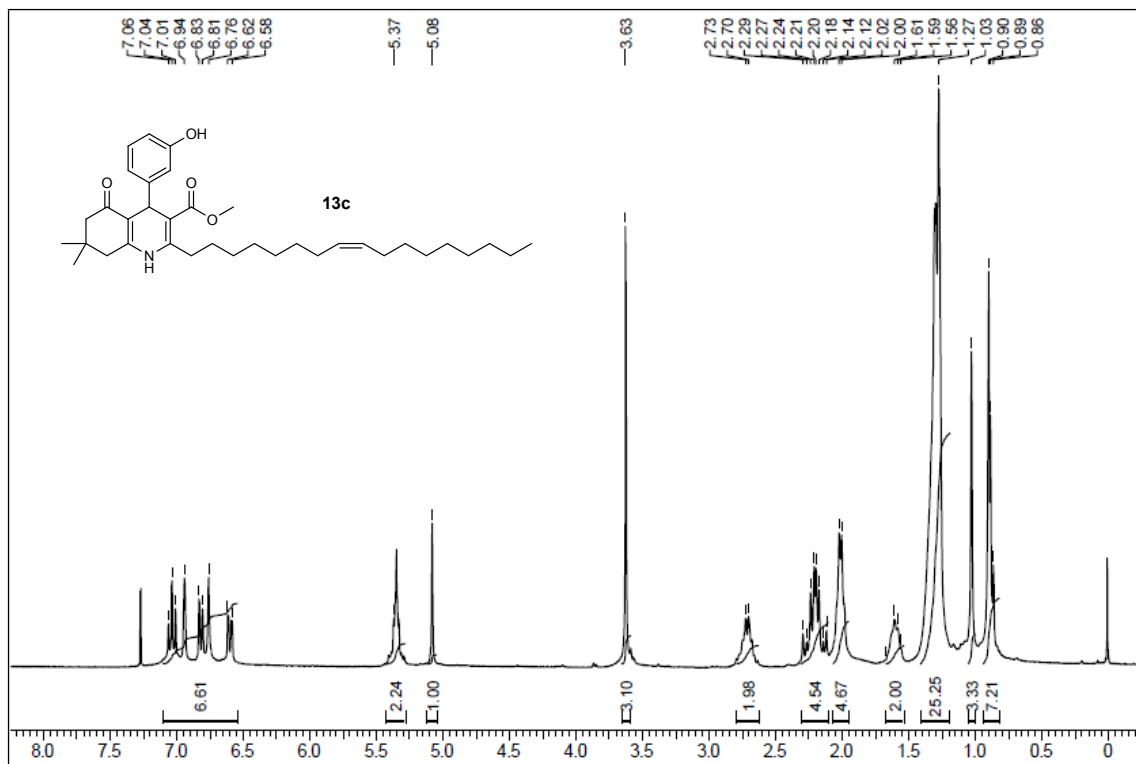

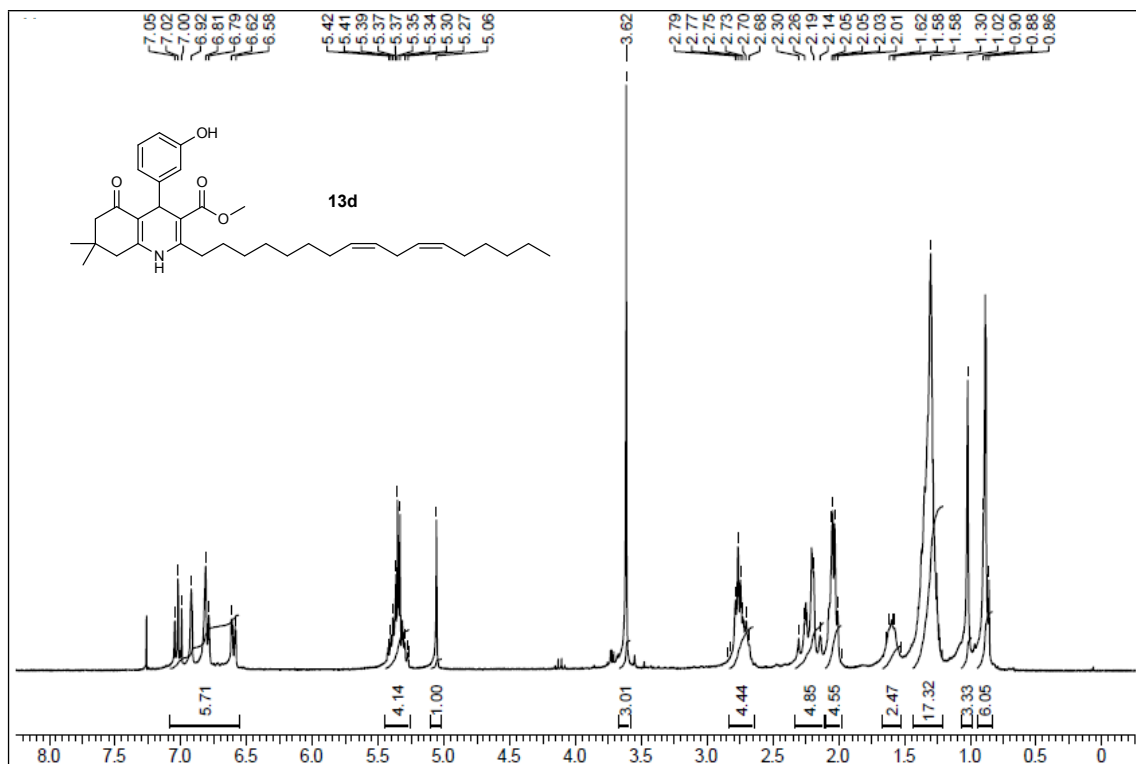

Figure S9.  $^1\text{H}$  NMR spectrum (CDCl<sub>3</sub>, 300 MHz) of **13d**.

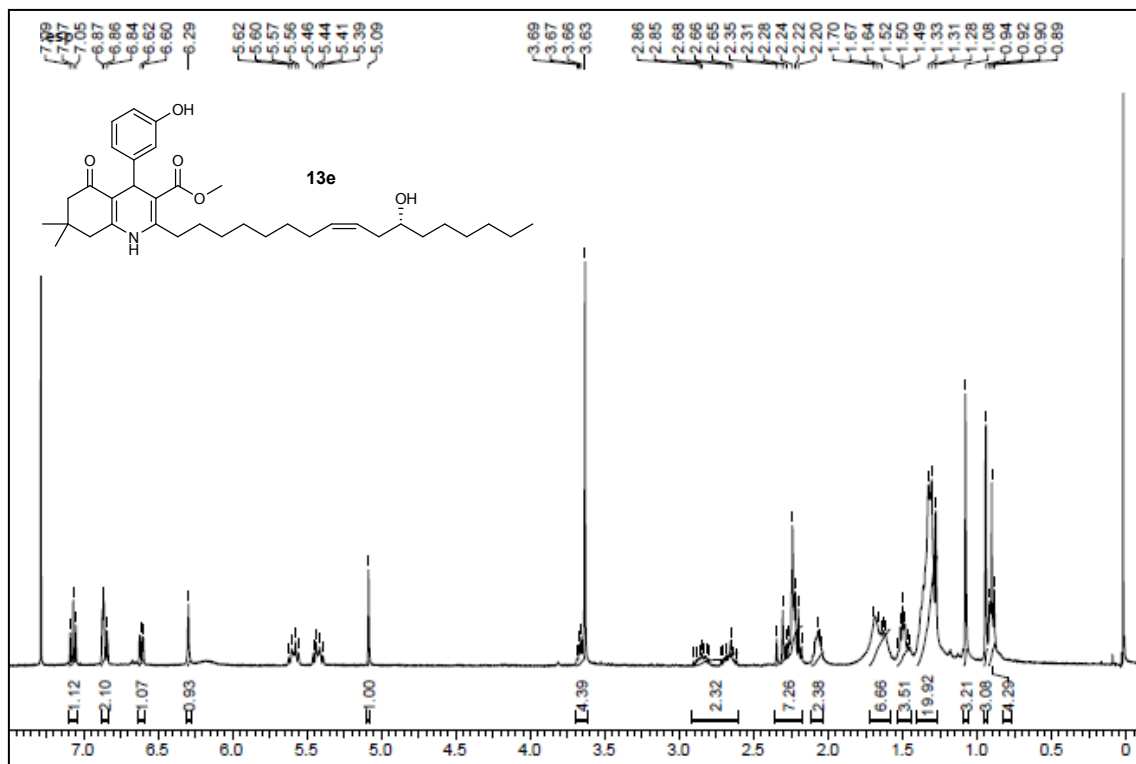

Figure S10.  $^1\text{H}$  NMR spectrum (CDCl<sub>3</sub>, 300 MHz) of **13e**.

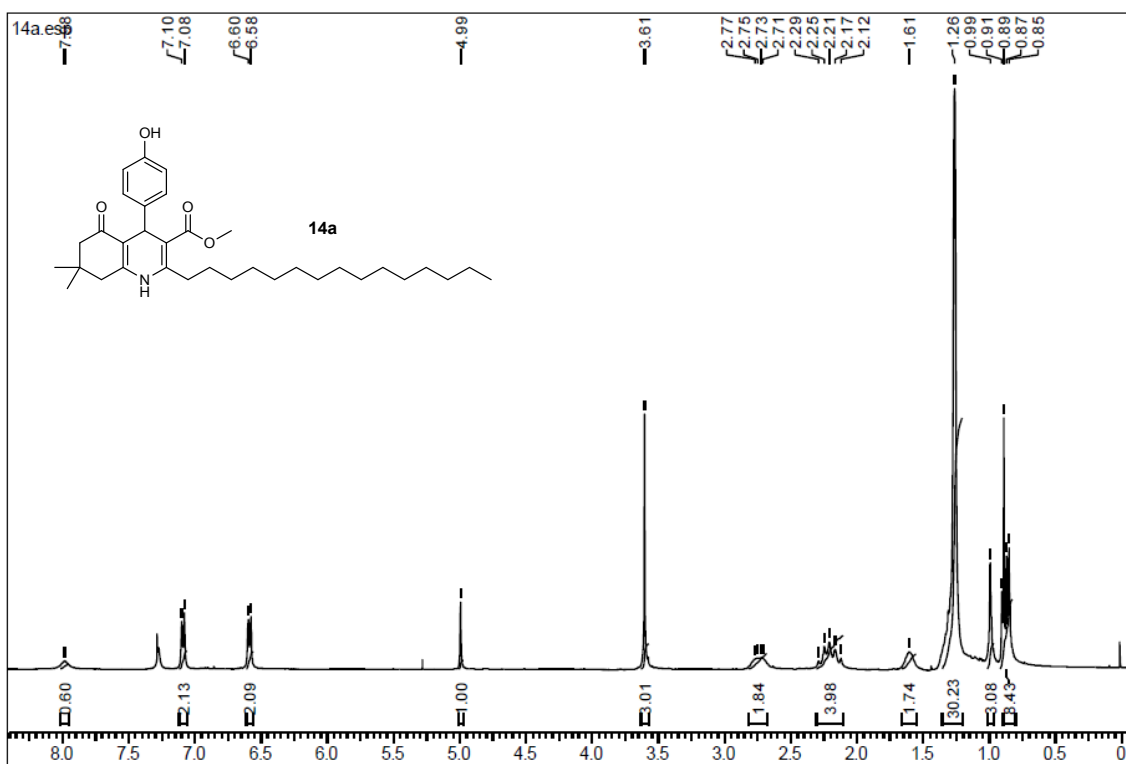

Figure S11.  $^1\text{H}$  NMR spectrum ( $\text{CDCl}_3$ , 300 MHz) of 14a.

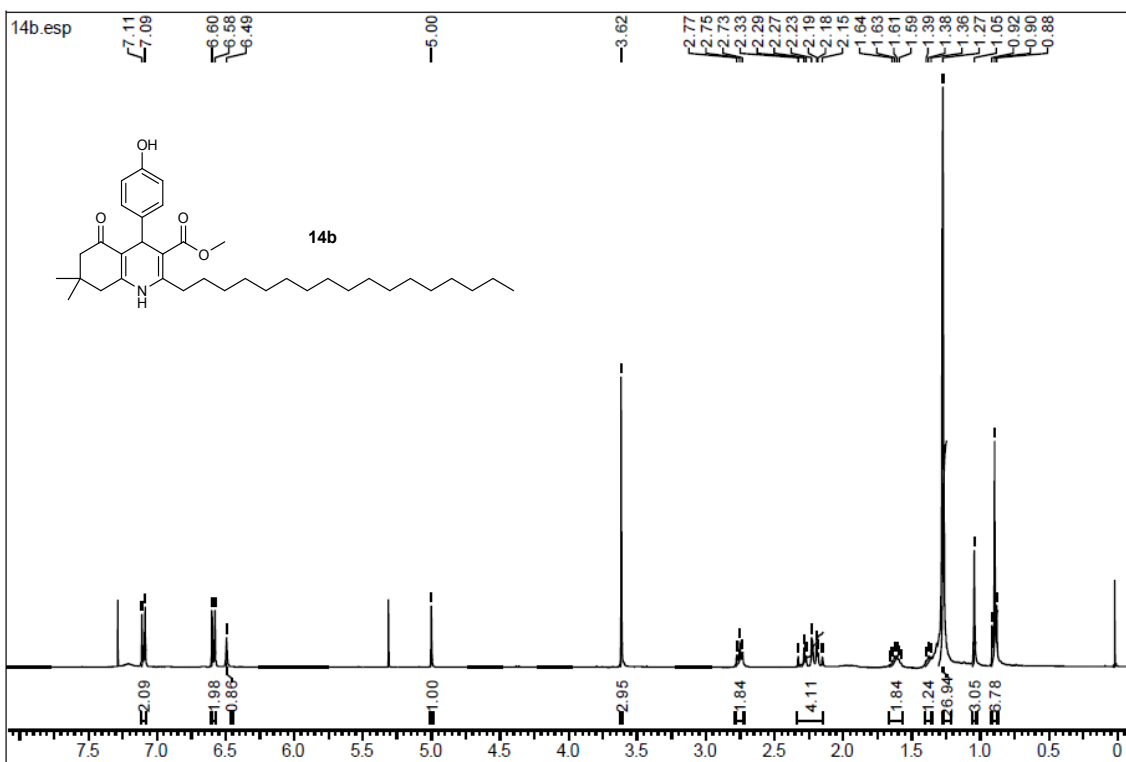

Figure S12.  $^1\text{H}$  NMR spectrum ( $\text{CDCl}_3$ , 300 MHz) of 14b.

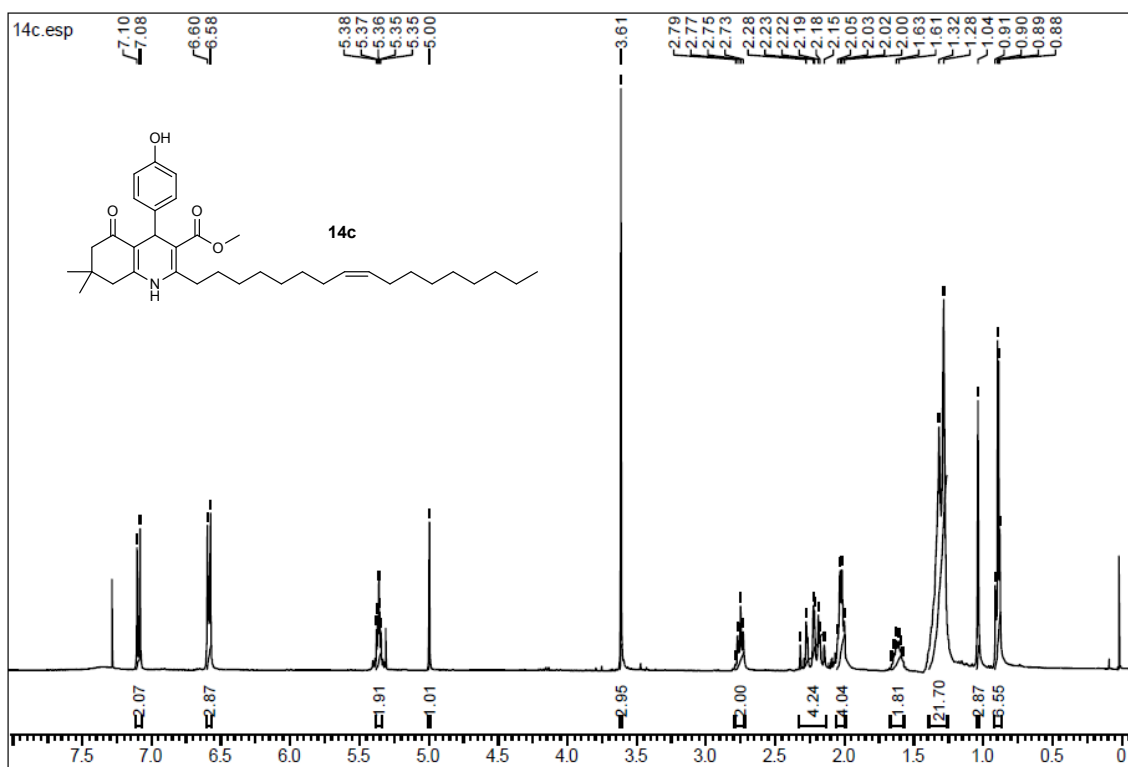

Figure S13.  $^1\text{H}$  NMR spectrum ( $\text{CDCl}_3$ , 300 MHz) of 14c.

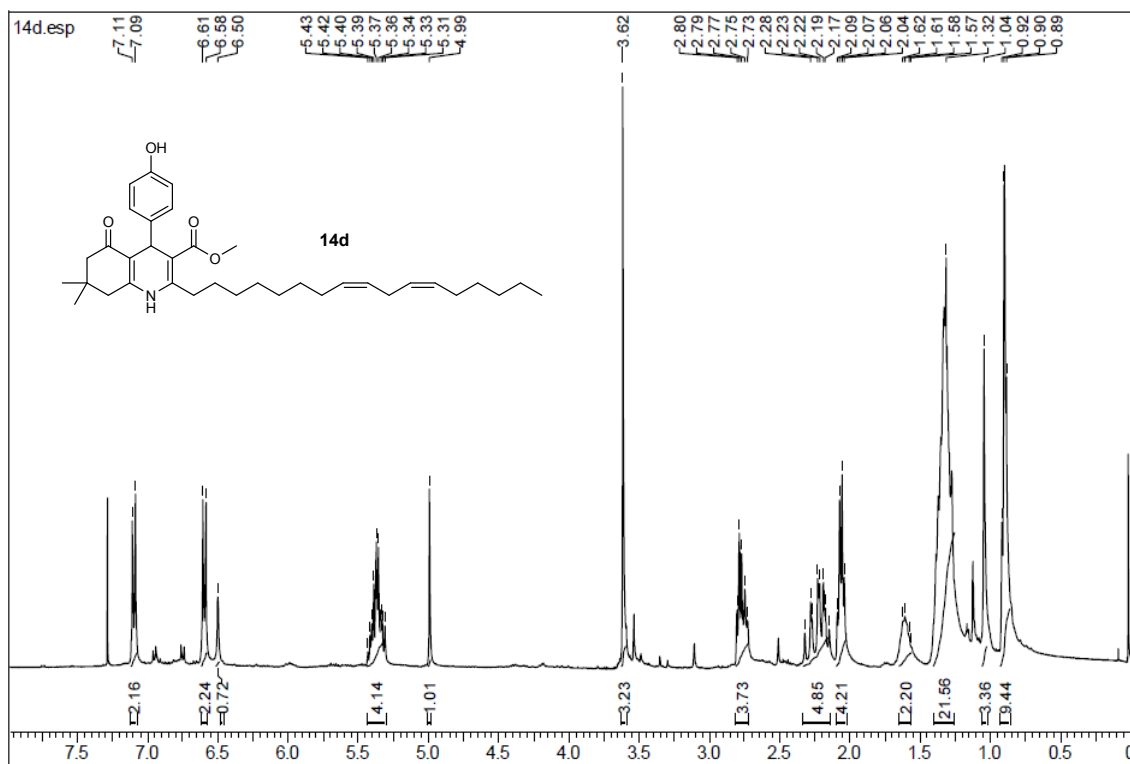

Figure S14.  $^1\text{H}$  NMR spectrum ( $\text{CDCl}_3$ , 300 MHz) of 14d.



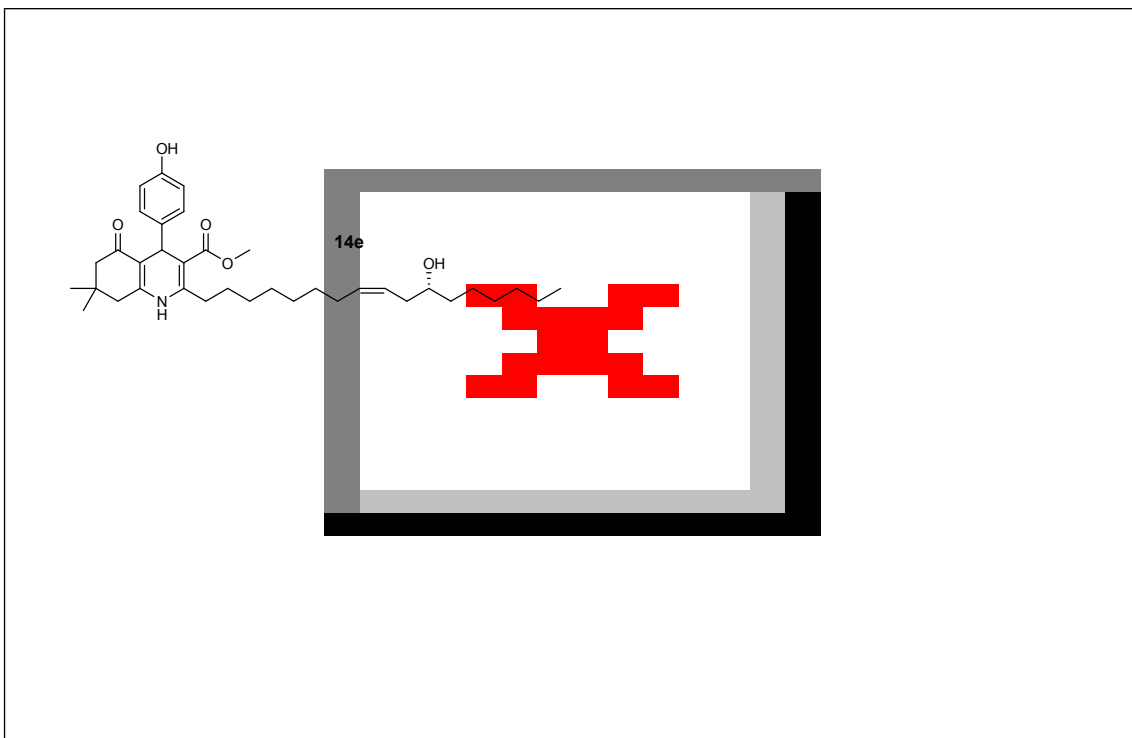

Figure S15.  $^1\text{H}$  NMR spectrum ( $\text{CDCl}_3$ , 300 MHz) of 14e.

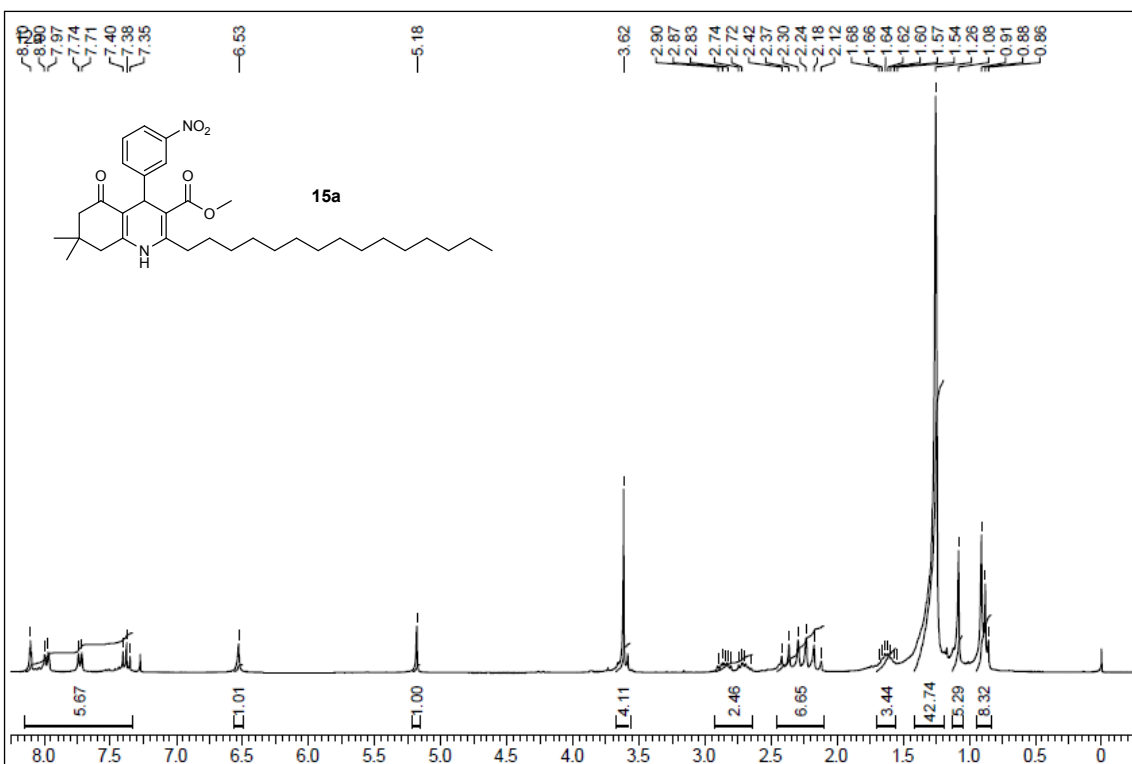

Figure S16.  $^1\text{H}$  NMR spectrum ( $\text{CDCl}_3$ , 300 MHz) of 15a.

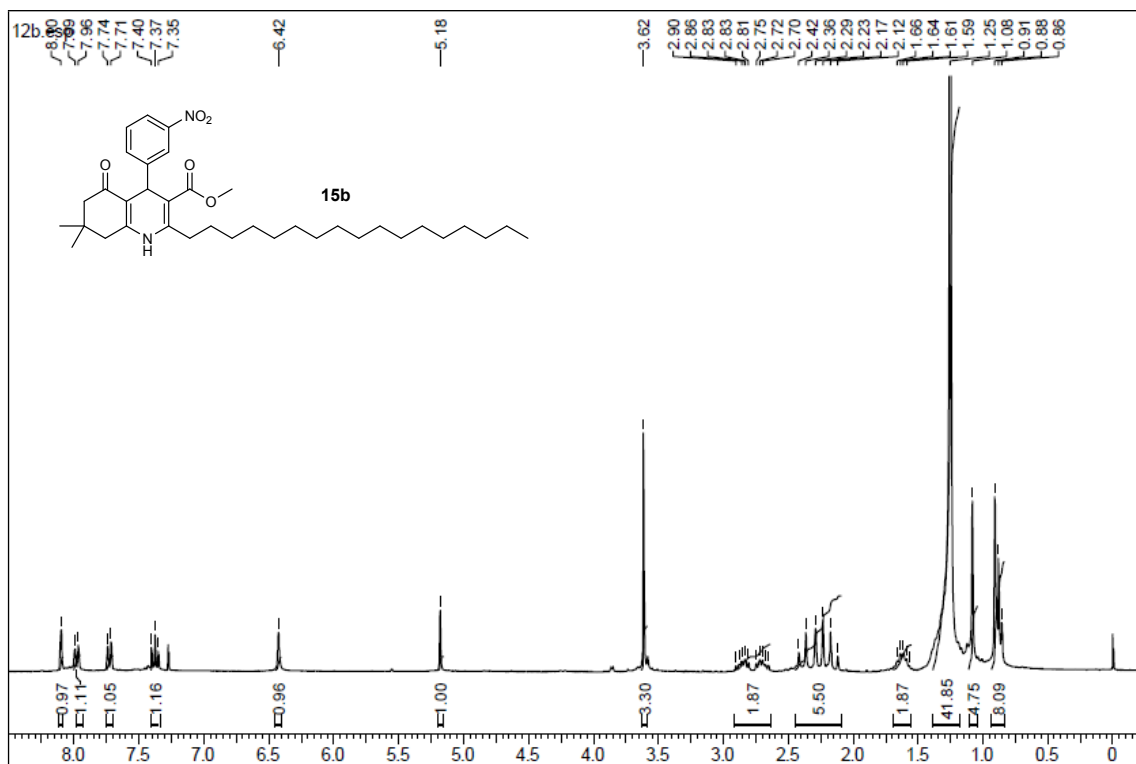

Figure S17.  $^1\text{H}$  NMR spectrum ( $\text{CDCl}_3$ , 300 MHz) of **15b**.

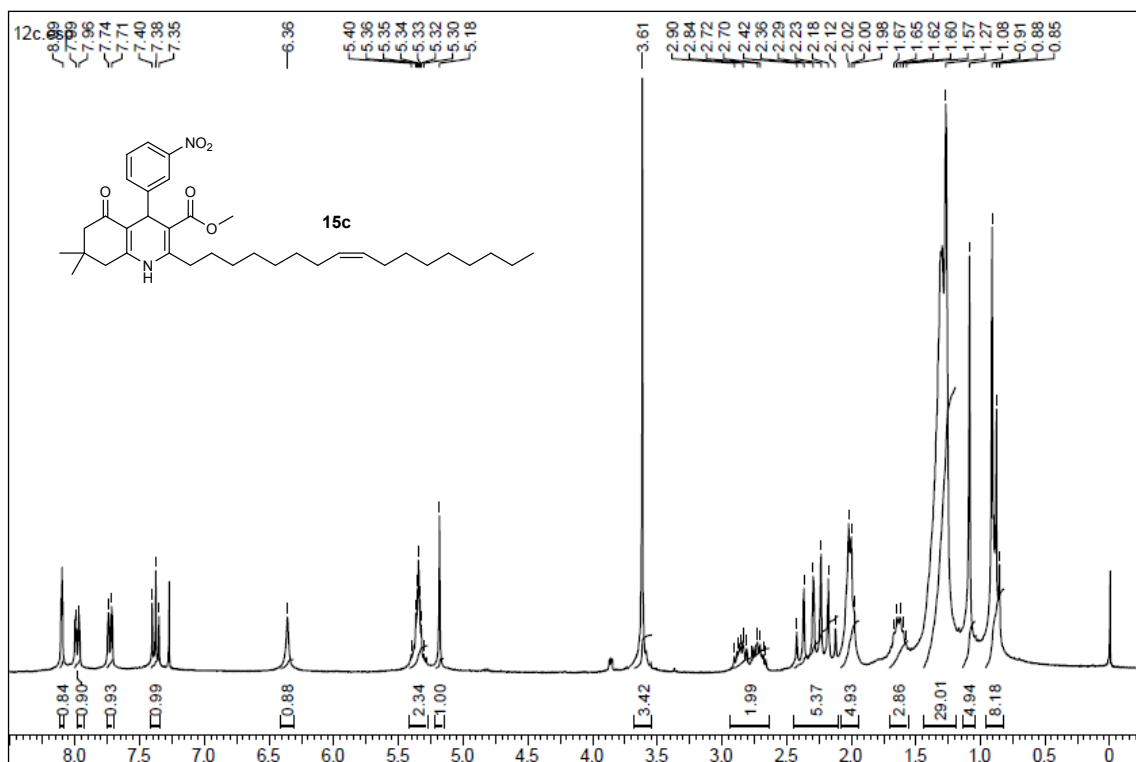

Figure S18.  $^1\text{H}$  NMR spectrum ( $\text{CDCl}_3$ , 300 MHz) of **15c**.

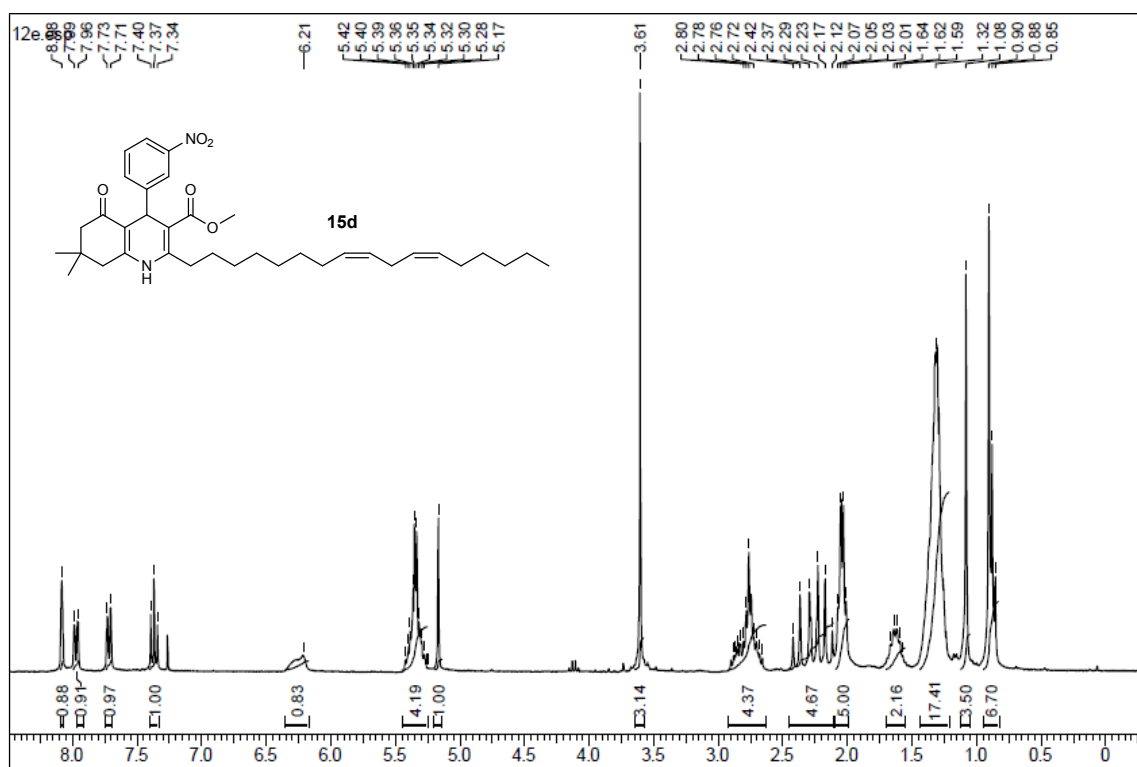

Figure S19. <sup>1</sup>H NMR spectrum (CDCl<sub>3</sub>, 300 MHz) of **15d**.

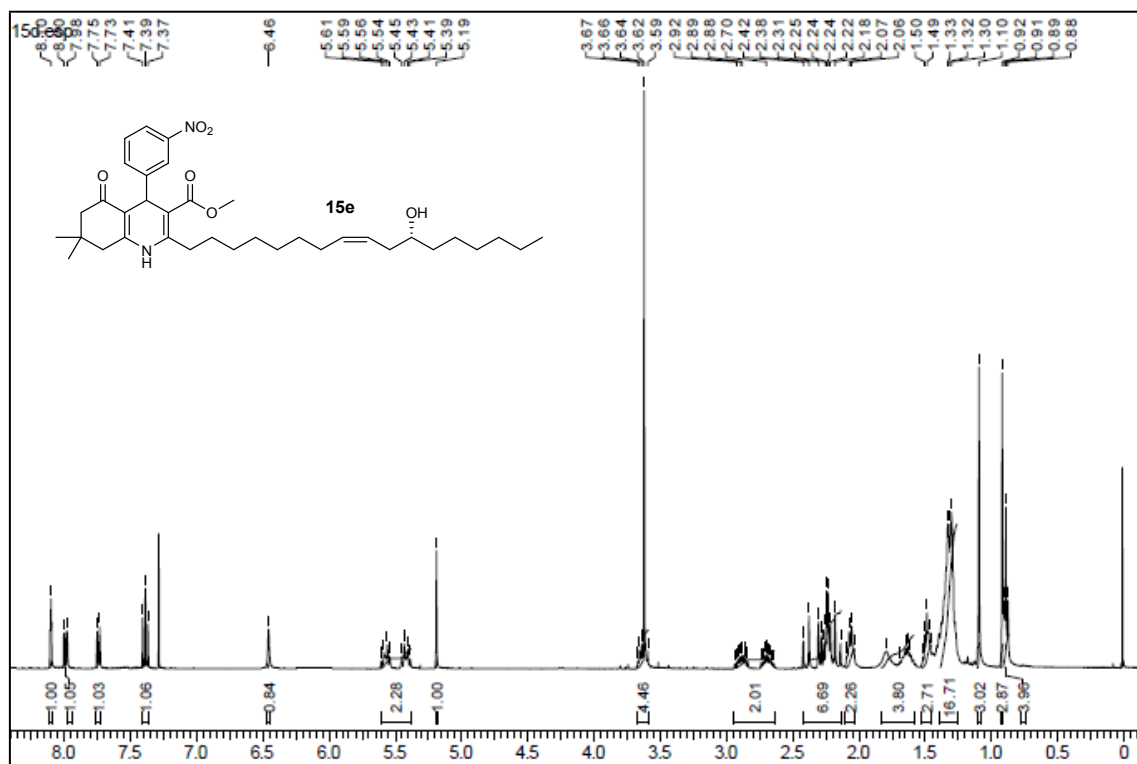

Figure S20. <sup>1</sup>H NMR spectrum (CDCl<sub>3</sub>, 300 MHz) of **15e**.

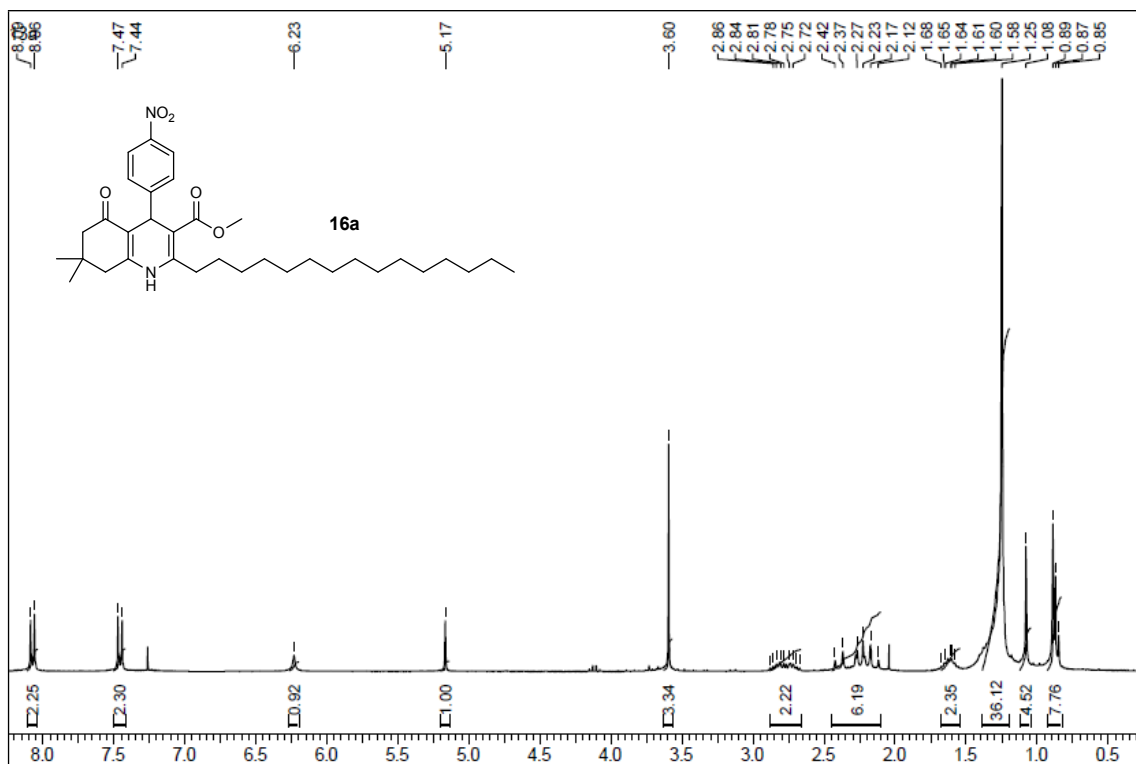

Figure S21. <sup>1</sup>H NMR spectrum (CDCl<sub>3</sub>, 300 MHz) of **16a**.

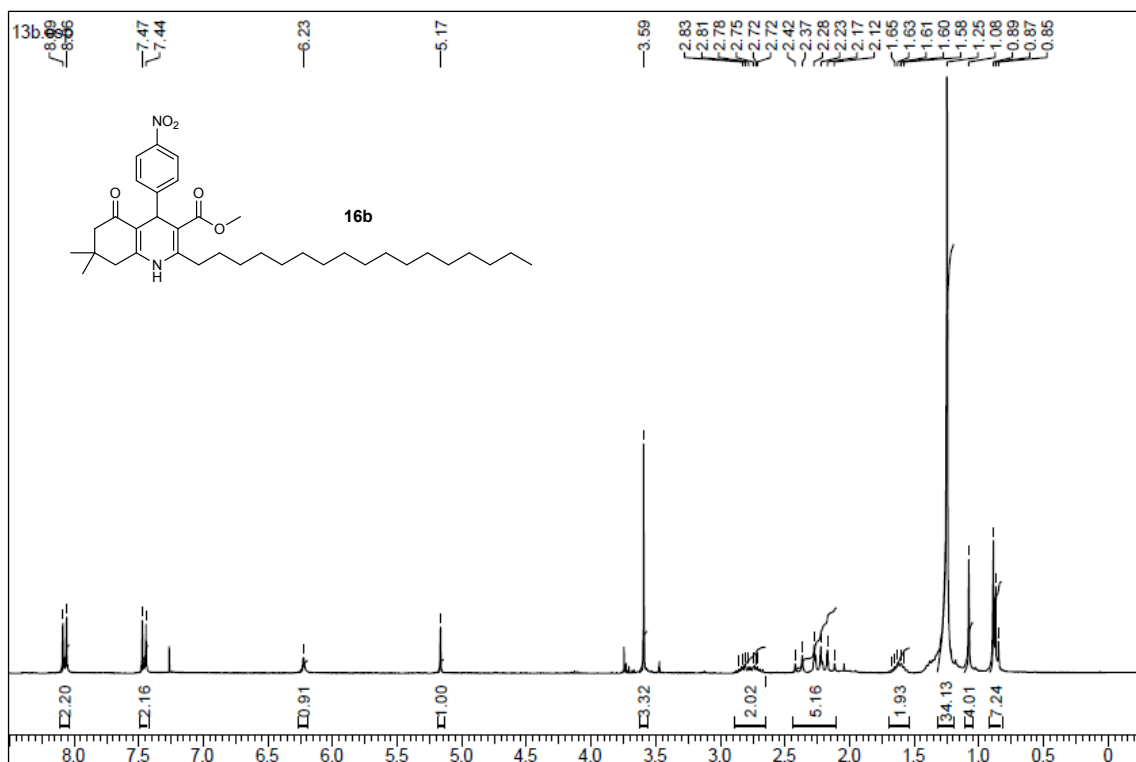

Figure S22. <sup>1</sup>H NMR spectrum (CDCl<sub>3</sub>, 300 MHz) of **16b**.

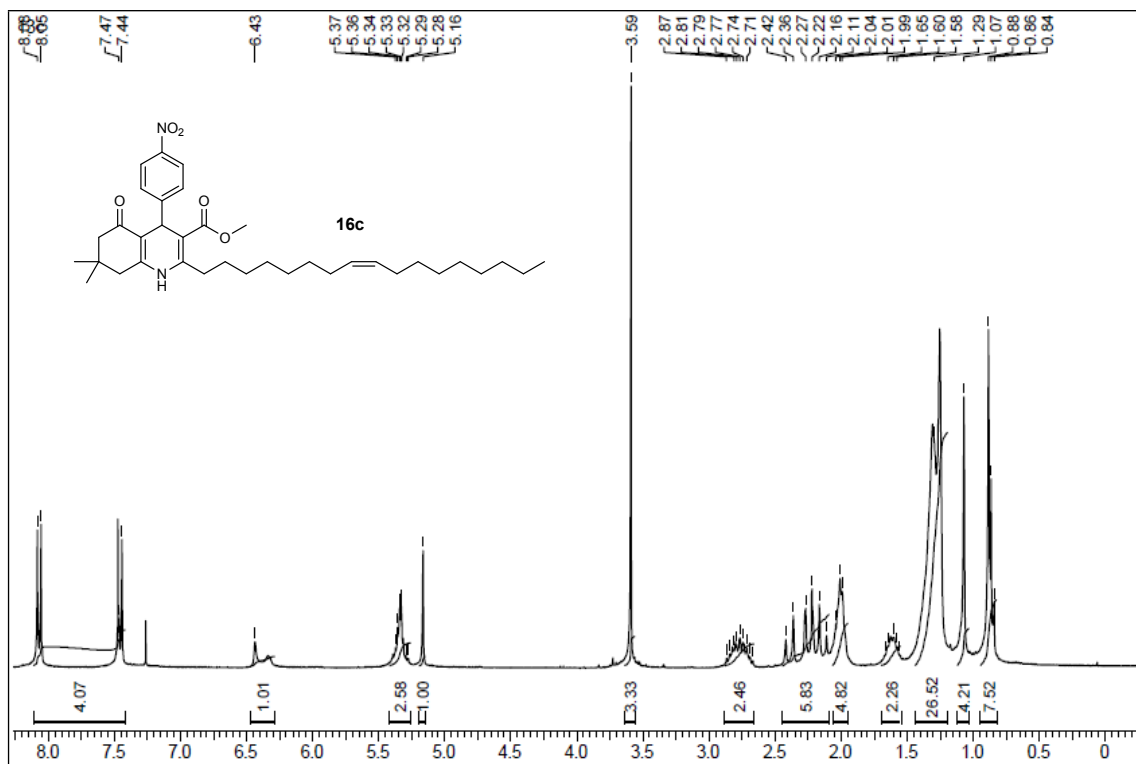

Figure S23. <sup>1</sup>H NMR spectrum (CDCl<sub>3</sub>, 300 MHz) of **16c**.

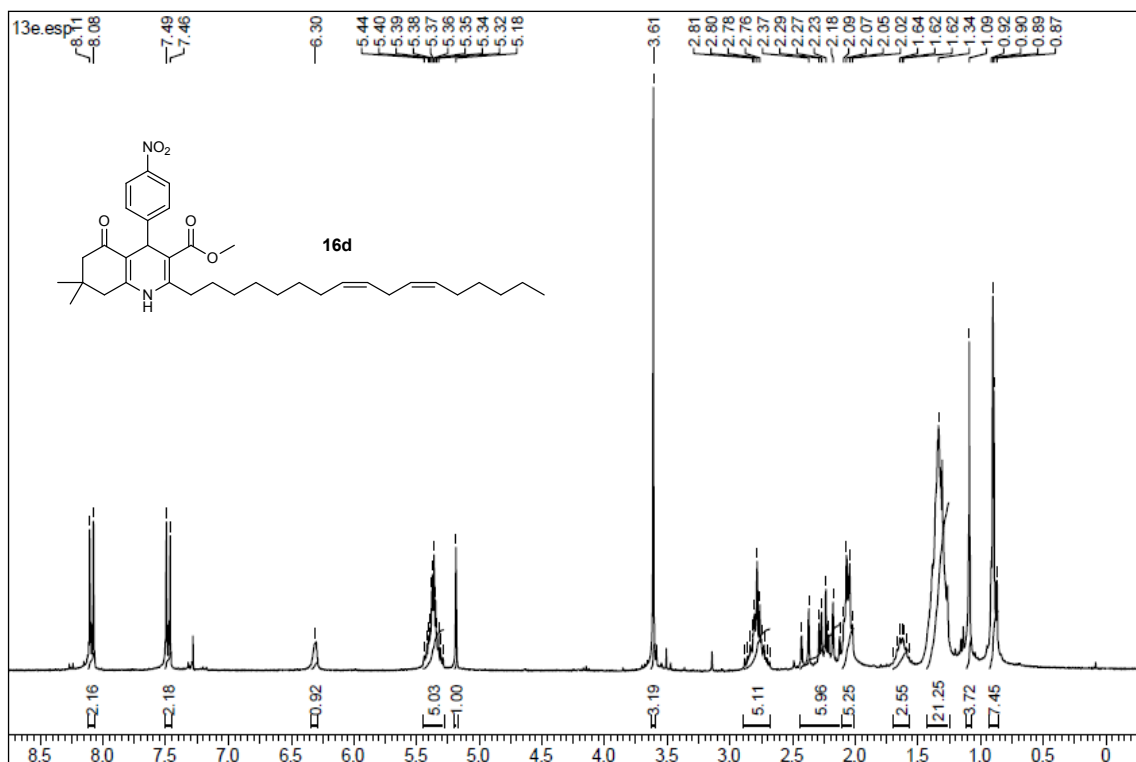

Figure S24. <sup>1</sup>H NMR spectrum (CDCl<sub>3</sub>, 300 MHz) of **16d**.

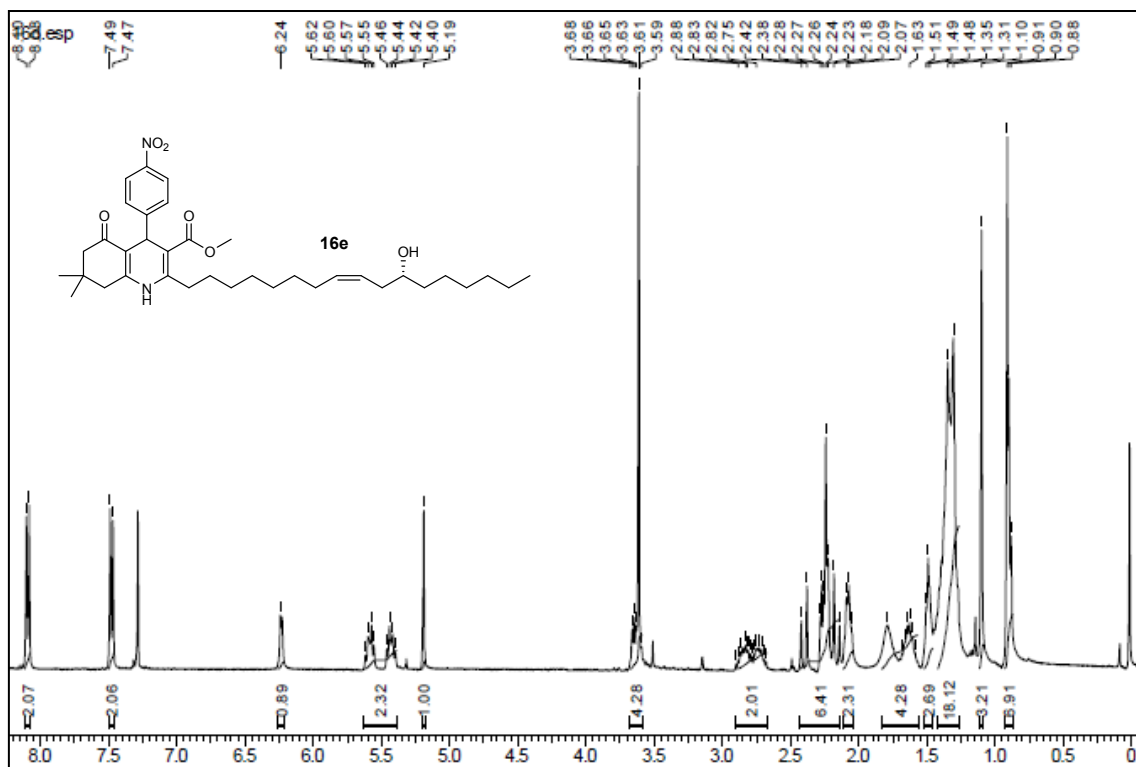

Figure S25. <sup>1</sup>H NMR spectrum (CDCl<sub>3</sub>, 300 MHz) of **16e**.

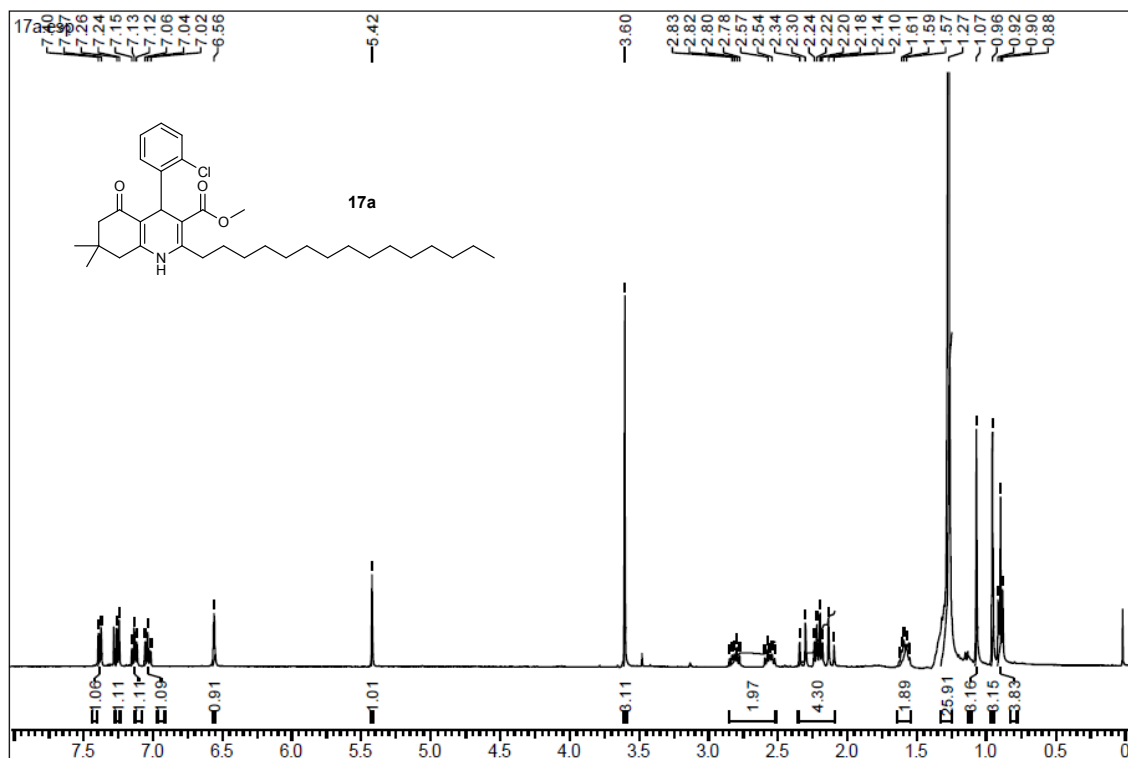

Figure S26. <sup>1</sup>H NMR spectrum (CDCl<sub>3</sub>, 300 MHz) of **17a**.

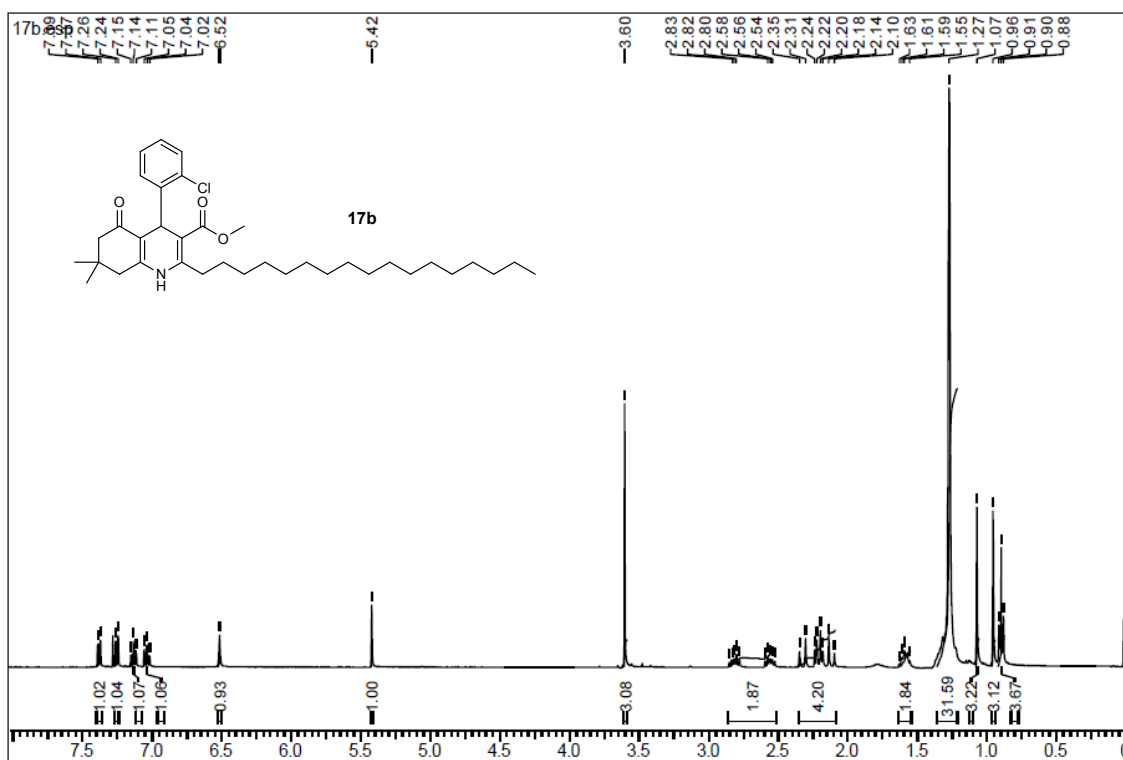

Figure S27. <sup>1</sup>H NMR spectrum (CDCl<sub>3</sub>, 300 MHz) of 17b.

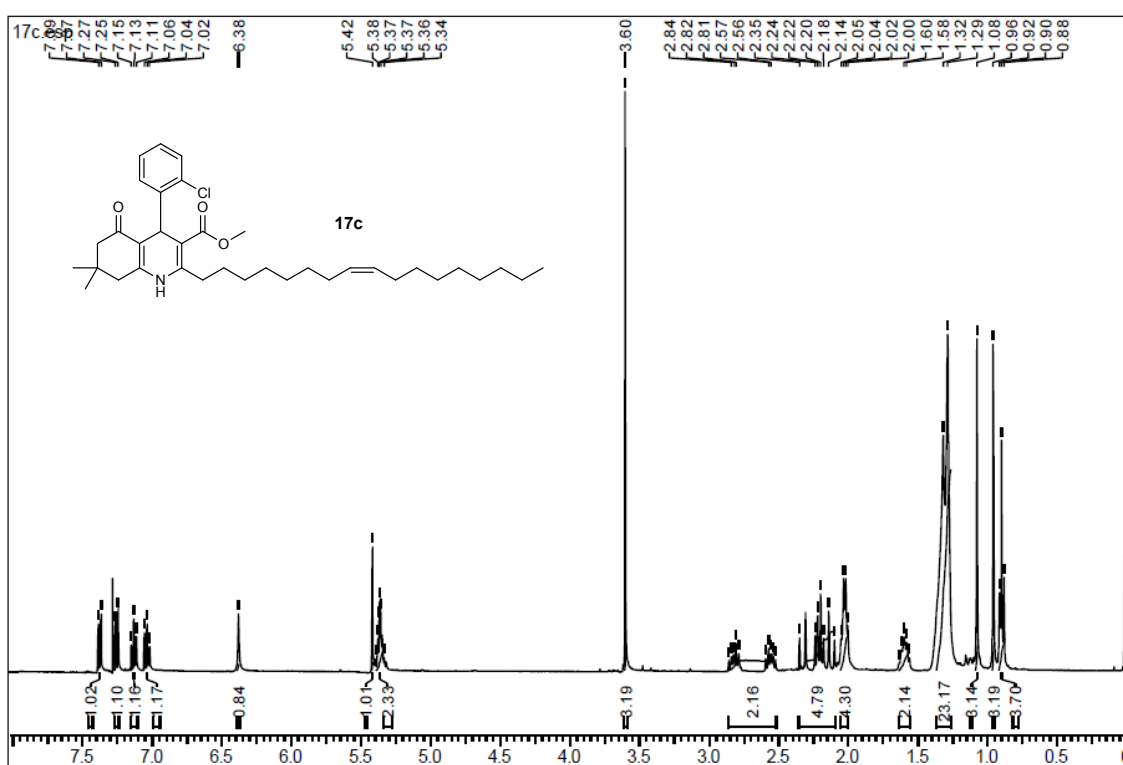

Figure S28. <sup>1</sup>H NMR spectrum (CDCl<sub>3</sub>, 300 MHz) of 17c.

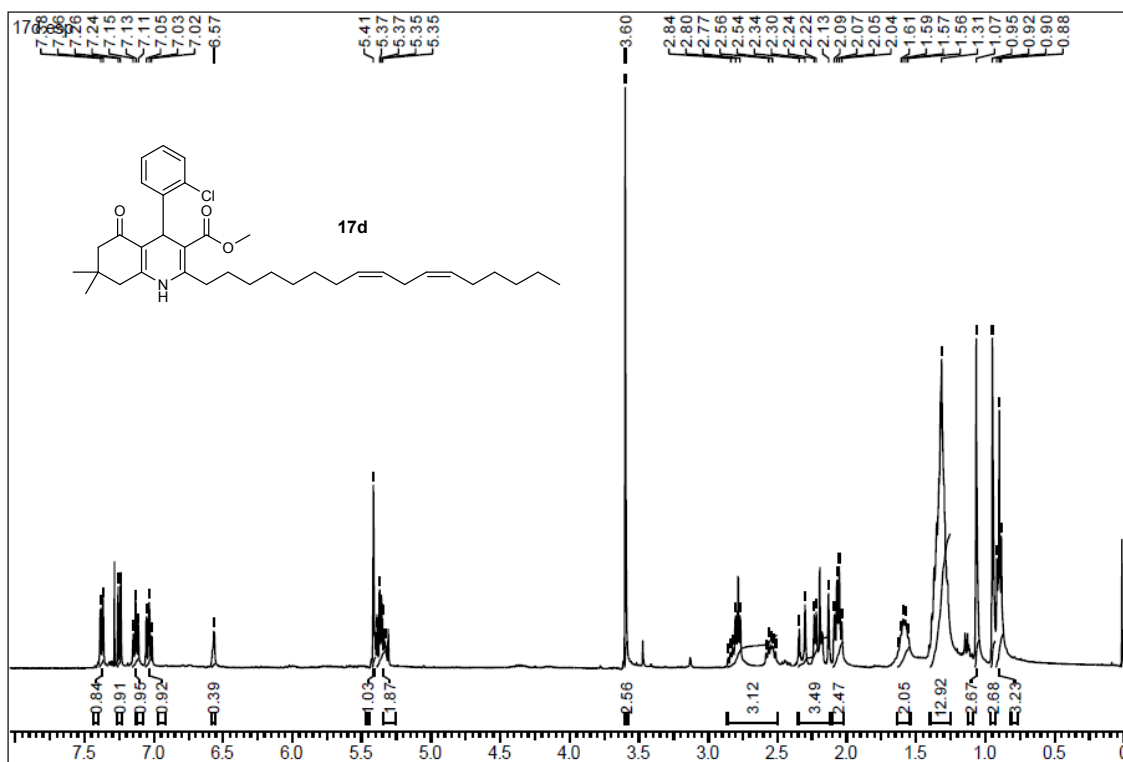

**Figure S29.**  $^1\text{H}$  NMR spectrum ( $\text{CDCl}_3$ , 300 MHz) of **17d**.

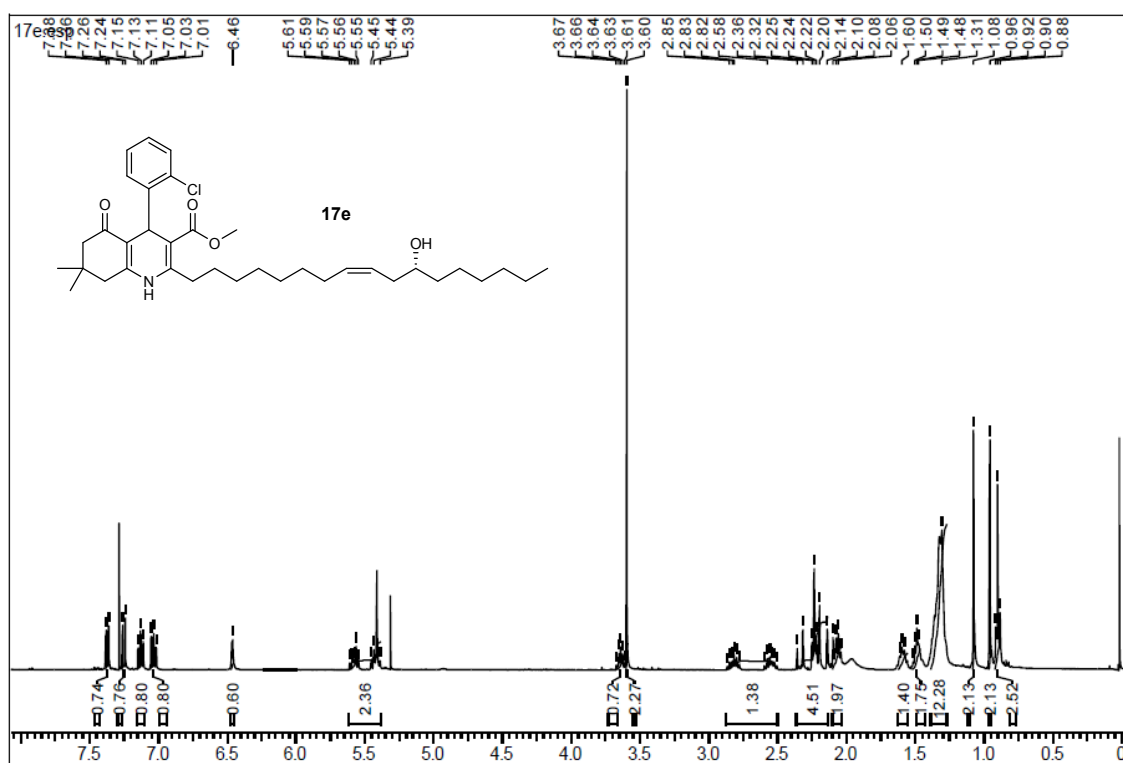

**Figure S30.**  $^1\text{H}$  NMR spectrum ( $\text{CDCl}_3$ , 300 MHz) of **17e**.



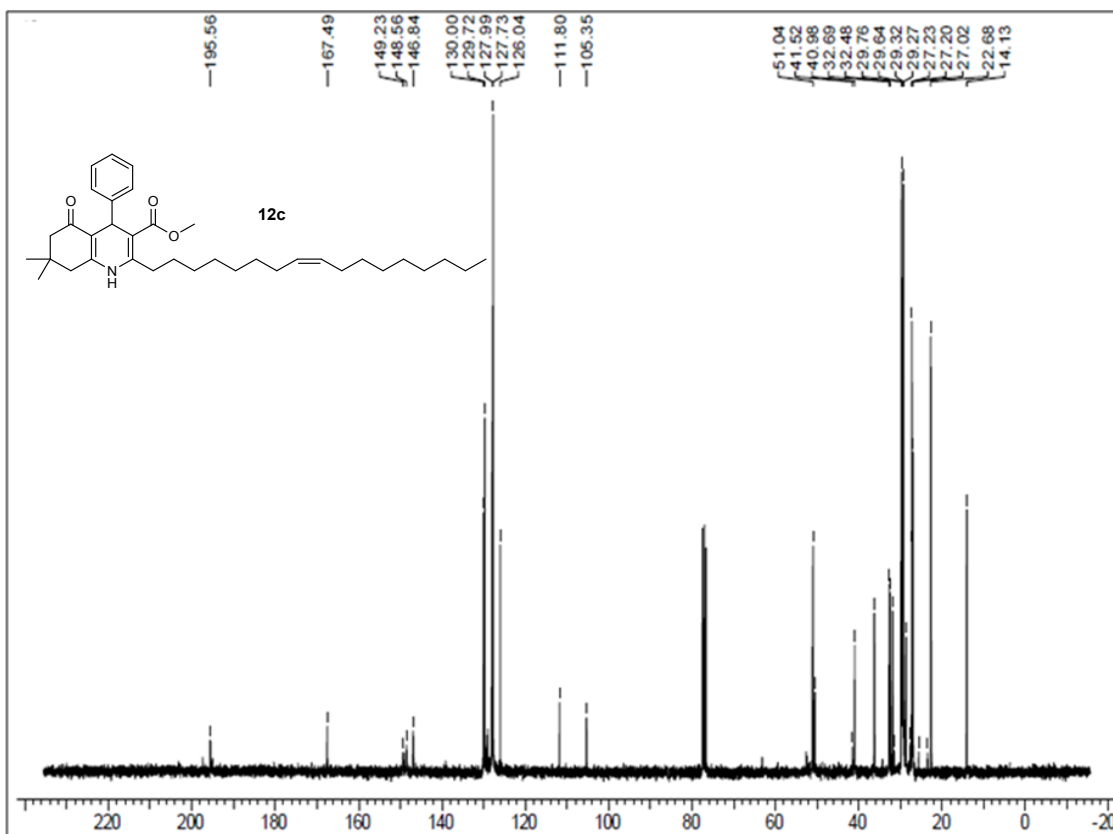

**Figure S31.** <sup>13</sup>C NMR spectrum (CDCl<sub>3</sub>, 300 MHz) of **12c**.

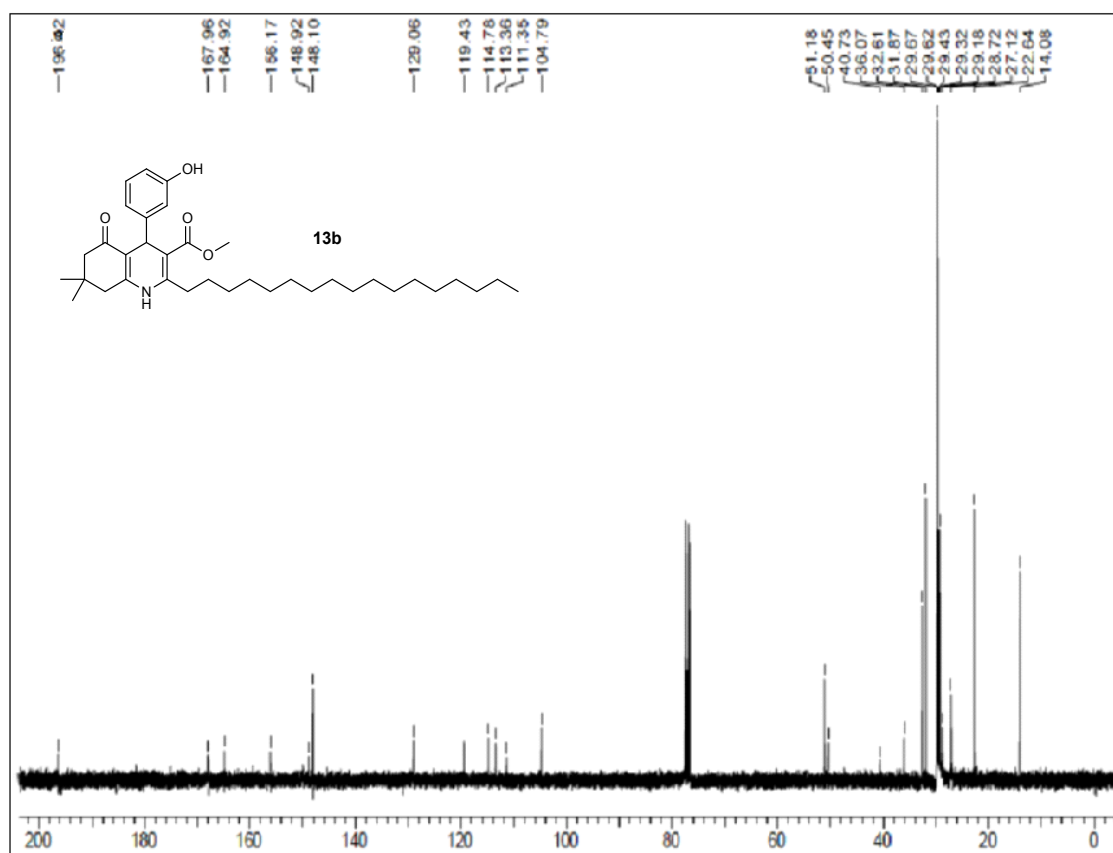

**Figure S32.** <sup>13</sup>C NMR spectrum (CDCl<sub>3</sub>, 300 MHz) of **13b**.

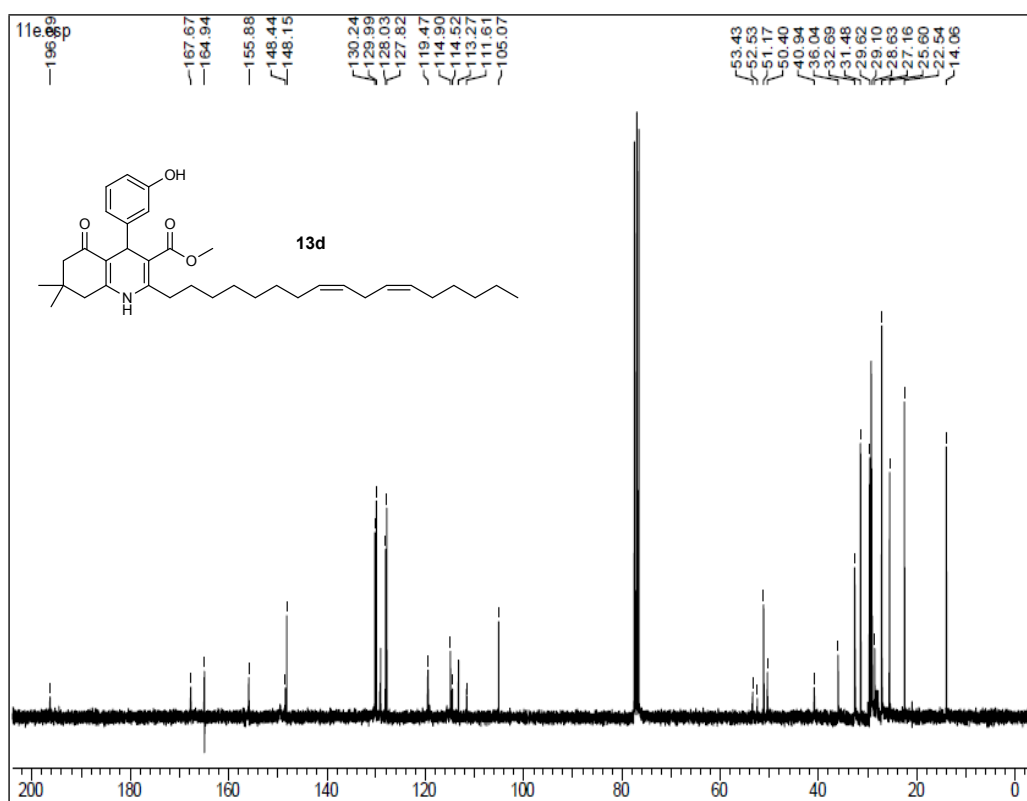

Figure S33.  $^{13}\text{C}$  NMR spectrum ( $\text{CDCl}_3$ , 300 MHz) of **13d**.

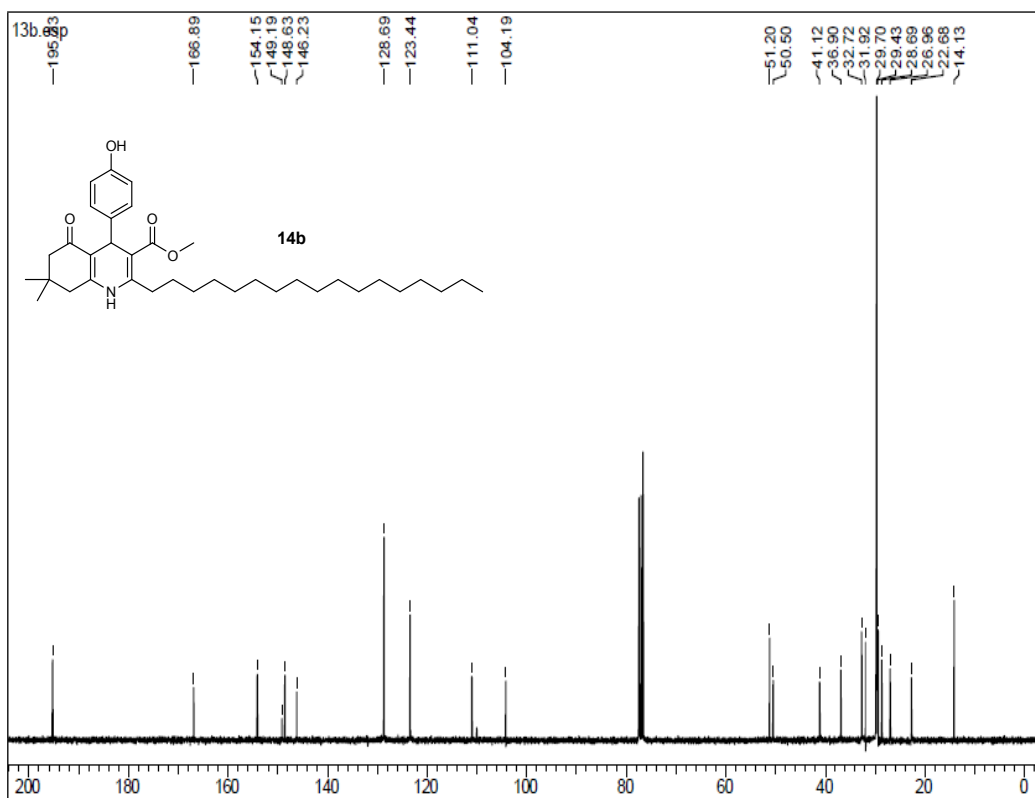

Figure S34.  $^{13}\text{C}$  NMR spectrum ( $\text{CDCl}_3$ , 300 MHz) of **14b**.

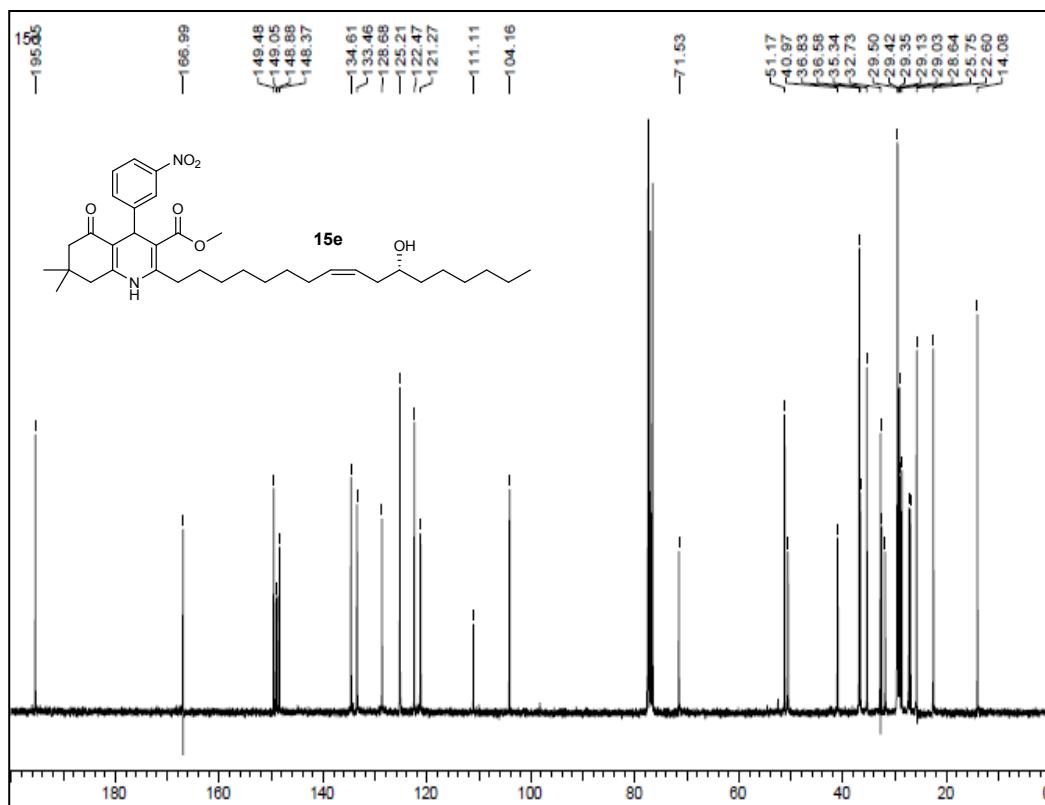

**Figure S35.**  $^{13}\text{C}$  NMR spectrum ( $\text{CDCl}_3$ , 300 MHz) of **15e**.

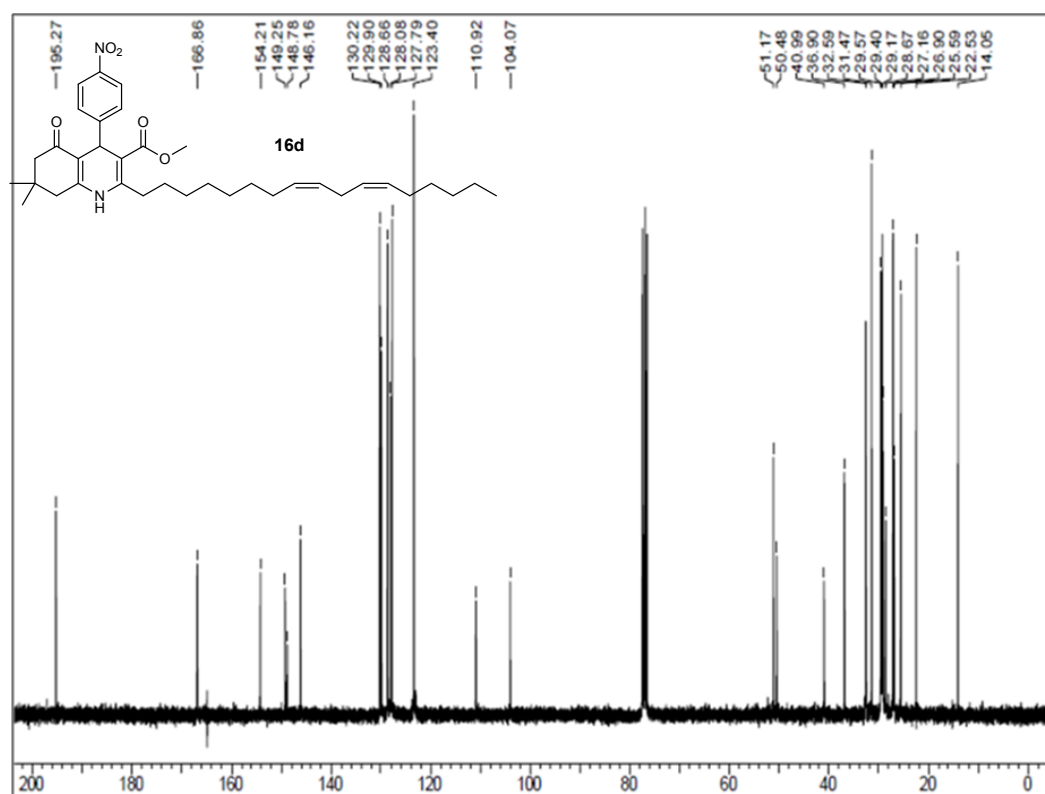

**Figure S36.**  $^{13}\text{C}$  NMR spectrum ( $\text{CDCl}_3$ , 300 MHz) of **16d**.
